# Supplementary material for: Prospective Study of Drug-induced Interstitial Lung Disease in Advanced Breast Cancer Patients Receiving Everolimus Plus Exemestane
Source: PubMed Central journal article supplement — Target Oncol. 2019 Jul 19;14(4):441–51. doi: 10.1007/s11523-019-00656-2 (PMC6684805; doi:10.1007/s11523-019-00656-2), 2019-07-19
Supplement: 11523_2019_656_MOESM1_ESM.pdf [file 11523_2019_656_MOESM1_ESM.pdf]

## Supplementary material

### Prospective study of drug-induced interstitial lung disease in advanced breast cancer patients receiving everolimus plus exemestane

#### Targeted Oncology

Annelieke E.C.A.B. Willemsen<sup>a</sup>, Jolien Tol<sup>b</sup>, Nielka P. van Erp<sup>c</sup>, Marianne A. Jonker<sup>d</sup>, Maaïke de Boer<sup>e</sup>, Bob Meek<sup>f</sup>, Paul C. de Jong<sup>g</sup>, Coline van Moorsel<sup>f,h</sup>, Winald R. Gerritsen<sup>a</sup>, Jan C. Grutters<sup>f,h</sup>, Carla M.L. van Herpen<sup>a</sup>

a: Radboud university medical center, Department of Medical Oncology, P.O. Box 9101, 6500 HB Nijmegen, the Netherlands

b: Jeroen Bosch Hospital, Department of Medical Oncology, P.O. Box 90153, 5200 ME 's-Hertogenbosch, the Netherlands.

c: Radboud university medical center, Department of Pharmacy, P.O. Box 9101, 6500 HB Nijmegen, the Netherlands.

d: Radboud university medical center, Department for Health Evidence, P.O. Box 9101, 6500 HB Nijmegen, the Netherlands

e: Maastricht University Medical Center, Division of Medical Oncology Department of Internal Medicine, GROW-School of Oncology and Developmental Biology, Maastricht, the Netherlands.

f: St. Antonius Hospital, Centre of Interstitial Lung Diseases, Department of Pulmonology, Nieuwegein

g: St. Antonius Hospital, Department of Medical Oncology, the Netherlands

h: Division Heart & Lungs, University Medical Center Utrecht, the Netherlands

#### Corresponding author:

Prof. Carla M.L. van Herpen

carla.vanherpen@radboudumc.nl

## **METHODS**

### **Clinical evaluation**

In case of (suspected) ILD the decision for treatment discontinuation was based on the discretion of the treating physician. Follow-up stopped if a patient discontinued everolimus due to progressive disease. If discontinuation was due to ILD, evaluation was continued during the recovery of ILD.

### **Pulmonary function tests**

Before quantitative analysis, we depicted our data graphically. In patients who discontinued everolimus due to ILD it was visually evaluated if a decrease in DLCOc or FVC preceded discontinuation. The relationship between the severity of respiratory symptoms at the first moment of the patient's highest severity classification and the degree of decrease in DLCOc at that moment was studied visually. Spaghetti plots were constructed showing the change in DLCOc in patients with (suspected) ILD to compare patients with and without the need for discontinuation of everolimus treatment. As changes in PFT in the period before discontinuation are of main interest, this plot is constructed with on the x-axis the number of days before "day zero": the day of everolimus discontinuation or maximally the 120<sup>st</sup> day of treatment in patients who continued treatment. The slopes in the period of the last six weeks of these groups were compared by measuring the absolute change in DLCOc divided by the number of days. The period of six weeks was chosen by clinical experience, as this is the time over which ILD often develops and deteriorates.

### **Pneumoproteins**

One 9ml lithium-heparine tube and one 9ml serum tube with clot activator were collected. Following centrifugation, plasma and serum were collected and dispersed over three aliquots, which were stored at - 80°C. YKL-40, CCL18, SP-D, and CA 15-3 levels were determined by two separate duplex bead-based immunoassays (R&D Systems) in accordance with the manufacturer's instructions.

Pneumoprotein concentrations were measured on a Bio-Plex System 100 (Bio-Rad). Enzyme-linked

immuno sorbent assay (ELISA) (BioVendor) was used for quantification of surfactant protein A (SP-A) and was performed in accordance with the manufacturer's instructions.

Supplementary table 1: diagnostic classification per patient at first moment of maximal classification

| Study id | Number of treatment days | CTCAE grade           | Significant PFT decline? | CT abnormalities                                                | Conclusion                                                         |
|----------|--------------------------|-----------------------|--------------------------|-----------------------------------------------------------------|--------------------------------------------------------------------|
| 1        | 14                       | 2 cough               | 0                        | no new pulmonary abnormalities                                  | alternative diagnosis: suspected viral upper respiratory infection |
| 2        | 91                       | 2 dysnea              | 1                        | ground glass opacities                                          | ILD                                                                |
| 3        | 84                       | 0                     | 0                        | no new pulmonary abnormalities                                  | no respiratory symptoms                                            |
| 4        | 11                       | 2 cough, 2 dyspnea    | 0                        | consolidations                                                  | suspected ILD                                                      |
| 5        | 35                       | 2 dysnea              | 0                        | pleural effusion                                                | alternative diagnosis: pleuritis carcinomatosa                     |
| 6        | 112                      | 1 cough, 3 dyspnea, 2 | 0                        | pleural effusion, infiltrative abnormalities, pleural effusion, | alternative diagnosis: pleuritis carcinomatosa                     |
| 7        | 46                       | cough, 1              | 0                        | and reticular thickening basal                                  | ILD                                                                |
| 8        | 89                       | dyspnea, 1            | 0                        | ground glass opacities and reticular thickening                 | suspected ILD                                                      |
| 9        | 17                       | 1 cough, 1            | 0                        | no new pulmonary abnormalities                                  | alternative diagnosis: PCR positive for                            |

|    |     |            |   |                                           |  |                                                |
|----|-----|------------|---|-------------------------------------------|--|------------------------------------------------|
|    |     | fever      |   |                                           |  | rhinovirus                                     |
|    |     | 1 cough, 1 |   |                                           |  |                                                |
| 10 | 34  | dyspnea    | 0 | infiltrative abnormalities                |  | suspected ILD                                  |
| 11 | 34  | 0          | 0 | infiltrative abnormalities                |  | suspected ILD                                  |
|    |     |            |   | infiltrative abnormalities, ground glass  |  |                                                |
|    |     | 2 cough, 2 |   | opacities, and thickening of interlobular |  |                                                |
| 12 | 79  | dyspnea    | 0 | septae                                    |  | suspected ILD                                  |
| 13 | 62  | 1 dyspnea  | 0 | Ground glass opacities                    |  | suspected ILD                                  |
|    |     | 1 cough, 1 |   |                                           |  | alternative diagnosis: pleuritis carcinomatosa |
| 14 | 13  | dyspnea    | 0 | pleural fluid and pleuritis carcinomatosa |  | and possible lymphangitic carcinomatosa        |
| 15 | 62  | 0          | 0 | no new pulmonary abnormalities            |  | no respiratory symptoms                        |
|    |     |            |   | infiltrative abnormalities, ground glass  |  |                                                |
| 16 | 119 | 2 cough    | 0 | opacities                                 |  | suspected ILD                                  |
|    |     |            |   |                                           |  | alternative diagnosis: suspected viral upper   |
| 17 | 48  | 2 dysnea   | 0 | no new pulmonary abnormalities            |  | respiratory infection                          |
| 18 | 57  | 0          | 0 | no new pulmonary abnormalities            |  | no respiratory symptoms                        |

|    |    |              |   |                                            |                                              |
|----|----|--------------|---|--------------------------------------------|----------------------------------------------|
| 19 | 55 | 0            | 0 | no new pulmonary abnormalities             | no respiratory symptoms                      |
| 20 | 32 | 0            | 0 | infiltrative abnormalities                 | suspected ILD                                |
| 21 | 60 | 0            | 0 | no new pulmonary abnormalities             | no respiratory symptoms                      |
|    |    | 2 dyspnea, 1 |   |                                            | alternative diagnosis: proven Pneumocystis   |
| 22 | 45 | cough        | 0 | consolidation                              | jirovecii pneumonia                          |
|    |    | 2 cough, 2   |   |                                            |                                              |
| 23 | 51 | dyspnea      | 1 | consolidations and ground glass opacities  | ILD                                          |
| 24 | 89 | 2 dysnea     | 0 | consolidation and pleural effusion         | suspected ILD                                |
|    |    |              |   | consolidations, ground glass opacities and |                                              |
| 25 | 90 | 1 cough      | 0 | reticular thickening                       | suspected ILD                                |
|    |    |              |   |                                            | alternative diagnosis: suspected viral upper |
| 26 | 14 | 1 cough      | 0 | no new pulmonary abnormalities             | respiratory infection                        |
| 27 | 35 | 0            | 0 | consolidations                             | suspected ILD                                |
